# Supplementary material for: Helicobacter pylori from Peruvian Amerindians: Traces of Human Migrations in Strains from Remote Amazon, and Genome Sequence of an Amerind Strain
Source: PLOS journal article supplement (doi:10.1371/journal.pone.0015076), 2010-11-29
Supplement: S12 (10.1371/journal.pone.0015076.s012) [file journal.pone.0015076.s012]

**Table S1.** Shi470 genes involved in natural transformation

| <u>gene name</u> | <u>orf in Shi470</u> | <u>size (aa)</u> |
|------------------|----------------------|------------------|
| <i>comB2</i>     | <i>hpsh_00080</i>    | 93               |
| <i>comB3</i>     | <i>hpsh_00085</i>    | 87               |
| <i>comB4</i>     | <i>hpsh_00090</i>    | 787              |
| <i>comB6</i>     | <i>hpsh_00185</i>    | 351              |
| <i>comB7</i>     | <i>hpsh_00190</i>    | 37               |
| <i>comB8</i>     | <i>hpsh_00195</i>    | 247              |
| <i>comB9</i>     | <i>hpsh_00200</i>    | 321              |
| <i>comB10</i>    | <i>hpsh_00205</i>    | 378              |
| <i>comE</i>      | <i>hpsh_07045</i>    | 437              |
| <i>comH</i>      | <i>hpsh_07840</i>    | 479              |
| <i>comI</i>      | <i>hpsh_07135</i>    | 220              |
| <i>dprH</i>      | <i>hpsh_01730</i>    | 266              |
